# Supplementary material for: Associations of viral ribonucleic acid (RNA) shedding patterns with clinical illness and immune responses in Severe Acute Respiratory Syndrome Coronavirus 2 (SARS‐CoV‐2) infection
Source: PubMed Central journal article supplement (PMC7385430; doi:10.1002/cti2.1160), 2020-07-27
Supplement: CTI2-9-e1160-s001.pdf [file CTI2-9-e1160-s001.pdf]

**Supplementary Table 1: Correlations between plasma cytokine levels with days of virus clearance in COVID-19 patients**

| Immune mediator                | Correlation with days of virus clearance |          |                                                  |          |                                           |          |
|--------------------------------|------------------------------------------|----------|--------------------------------------------------|----------|-------------------------------------------|----------|
|                                | Total patients<br>(n = 81)               |          | Do not require mechanical ventilator<br>(n = 62) |          | Require mechanical ventilator<br>(n = 19) |          |
|                                | <i>rho</i>                               | <i>p</i> | <i>rho</i>                                       | <i>p</i> | <i>rho</i>                                | <i>p</i> |
| <b>EGF</b>                     | 0.2916                                   | **0.0083 | 0.1888                                           | 0.1417   | 0.5655                                    | *0.0116  |
| <b>FGF-2</b>                   | 0.2701                                   | *0.0147  | 0.1400                                           | 0.2779   | 0.6146                                    | **0.0051 |
| <b>GRO-<math>\alpha</math></b> | 0.3126                                   | **0.0045 | 0.1992                                           | 0.1206   | 0.5775                                    | **0.0096 |
| <b>RANTES</b>                  | 0.3015                                   | **0.0062 | 0.2263                                           | 0.0770   | 0.5176                                    | *0.0232  |
| <b>IL-1<math>\beta</math></b>  | -0.2483                                  | *0.0254  | -0.3314                                          | **0.0085 | 0.0779                                    | 0.7511   |
| <b>IL-17A</b>                  | -0.2435                                  | *0.0285  | -0.3333                                          | **0.0081 | 0.0683                                    | 0.7812   |

Correlation analysis was carried out using Spearman's rank correlation. \* $p < 0.05$ , \*\* $p < 0.01$ . EGF, epidermal growth factor; FGF-2, basic fibroblast growth factor; GRO- $\alpha$ , chemokine (C-X-C motif) ligand (CXCL) 1, RANTES, regulated on activation, normal T cell expressed and secreted IL-1 $\beta$ , interleukin-1 beta; IL-17A, interleukin-17A.
